# Supplementary material
Source: Elsevier journal article supplement (https://www.sciencedirect.com/science/article/pii/S1413867020301094)
Supplement: mmc1 [file S1413867020301094:mmc1.doc]

***PROTOCOL:***

**COVID-19 TRAFFIC LIGHT CARE PATHWAYS**

**AT …deleted, identifying….**

**…deleted, identifying….**

*on behalf of the*

**…deleted, identifying….**

***Institution Details***

**…deleted, identifying….**

***Background*****Accompanying slide set provided in Appendix*

Infection with the novel coronavirus SARS-CoV-2 (COVID-19) results in a spectrum of disease ranging from asymptomatic and mild cases, through moderate to severe disease, and death. Patients presenting to the emergency department are usually admitted to medical wards, a proportion are transferred to Critical Care Medicine, and a small proportion with apparently milder disease are discharged home, with~10-15% readmitted with more severe symptoms. Patients improve and are discharged home, or die ( *Appendix, Figure 1).*

***Rationale***

Patient symptoms, signs, measurements, and treatments are integrated by the admitting medical team to inform on the appropriate patient pathway. For COVID-19, multiple symptoms and signs on admission are used to classify how unwell the patient is at that particular time (*Appendix, Figures 2-3).*

Three clinical conditions lead to high proportions of deaths in COVID-19 patients:

- Pulmonary embolism and thromboembolic disease
- Cytokine storm
- Severe ARDS complicated with secondary infections

**If patients progressing towards these endpoints were identified earlier, this would enable targeted changes in management that may improve their health outcomes** (*Appendix, Figures 4-6*).

***Proposed Traffic Lights System***

To facilitate care of COVID-19 patients presenting to **…deleted, identifying….**

We plan to use this database to develop and deliver real-time “Traffic Light” warning signals to clinicians, indicating that their patient is at risk of one of the three states - Pulmonary embolism, Cytokine storm, and/or Severe ARDS. The database will be kept in a permanent development cycle to facilitate rapid additions and changes.

***Phase 1***

In the first phase, data will be gathered with respect to clinical parameters expected to distinguish patients with different patterns of disease (*Appendix, Figures 4-6*).These and other parameters will be mined for signals of deterioration in the context of the specific clinical state. A combination of mining, analysis process, and clinical observation will therefore be used to generate the most useful approach for immediate, prospective use.

In order to enable patients to benefit from the earliest possible timepoint, during this period, based on increasingly refined “Traffic Lights”, a daily report will be issued on all COVID-19 positive patients in the Trust, and sent to an experienced critical care clinician **deleted, identifying** for review. Results will be interpreted and fed back to the clinical teams to review and modify relevant pathways. The Traffic Light approach, and data when available, will be shared **deleted, identifying** and any clinical contacts arising. Clinical experience will be summarised in a manuscript for peer review and Preprint posting as soon as feasible.

***Phase 2***

In the second phase, data will be provided to a real-time dashboard for immediate feedback to general ward-based clinicians. Approaches and data sharing will continue. Clinical experience will be summarised in manuscript(s) for peer review and Preprint posting as soon as feasible.

***Phase 3***

Code will be made available on request, and submitted to **deleted, identifying** Ongoing pathway development is anticipated, with further manuscript(s) for peer review and Preprint posting as soon as feasible.

***Timeline Report***

| **Updates** | **Lead** | **Phase** | **Comment** |
| --- | --- | --- | --- |
| 20th March 2020 | **deleted, identifying** | 1 | Go Live for Phase 1 |
| 12th April 2020 | **deleted, identifying** | 2 | Go Live for Phase 2 |
| 14th April 2020 | **deleted, identifying** | 1 | Data download for interim Phase I analysis |
| 24th April 2020 | **deleted, identifying** | 1 | Data download for complete Phase I analysis |
| 28th April 2020 | **deleted, identifying** | 1 | **deleted, identifying** |
| 11th May 2020 | **deleted, identifying** | 1 | **deleted, identifying** |
| 21st May 2020 | **deleted, identifying** | 2 | Data download for first Phase 2 analysis |
| 30th May 2020 | **deleted, identifying** | 1 | **deleted, identifying** |
| 30h May 2020 | **deleted, identifying** | 3 | **deleted, identifying** |

***APPENDIX:***

**PROPOSED COVID-19 TRAFFIC LIGHT CARE PATHWAYS**

**deleted, identifying**

**
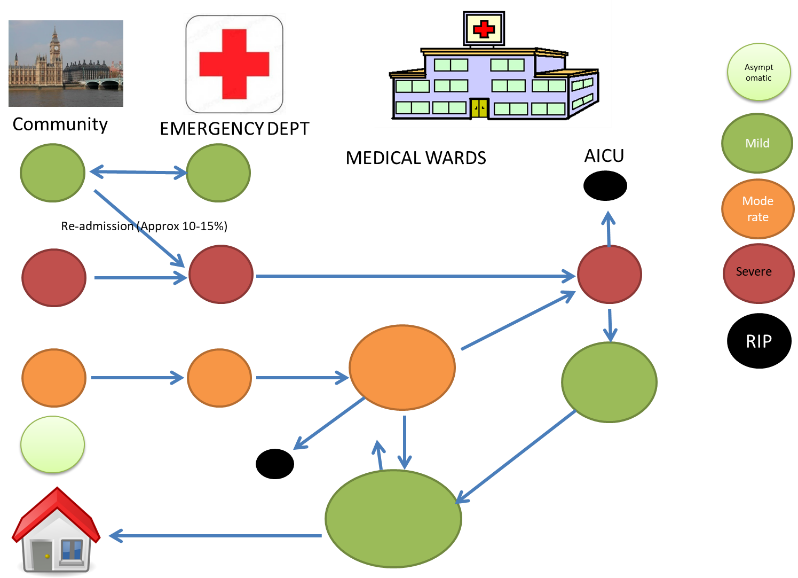
**

***Figure 1:
COVID-19 Patient Flows***

Colours indicate disease severity.

**deleted, identifying***, created March 2020*

**
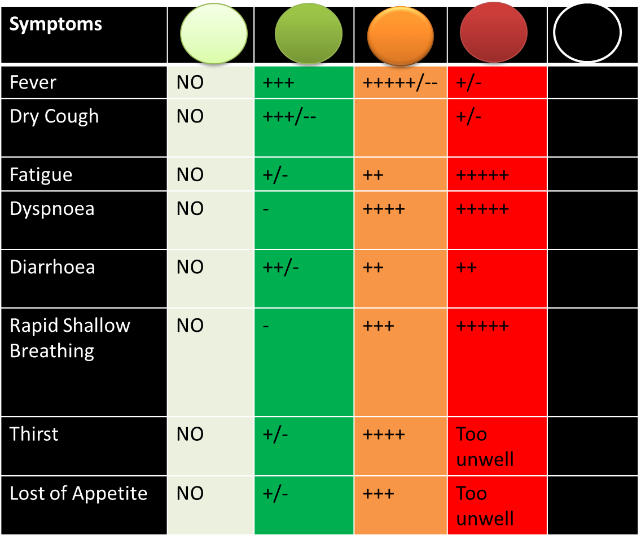
**

***Figure 2:
COVID-19 Patient symptoms***

Potential classification

**deleted, identifying***, created March 2020*

**
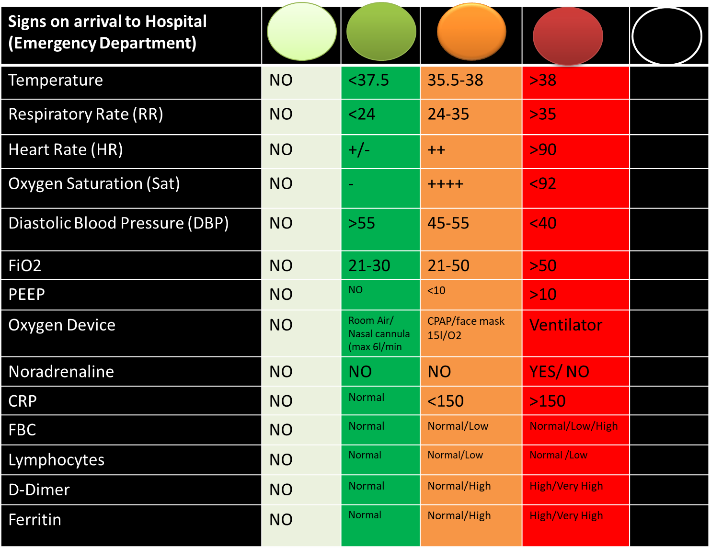
**

***Figure 3:
COVID-19 Patient signs***

Potential classification

**deleted, identifying***, created March 2020*

**
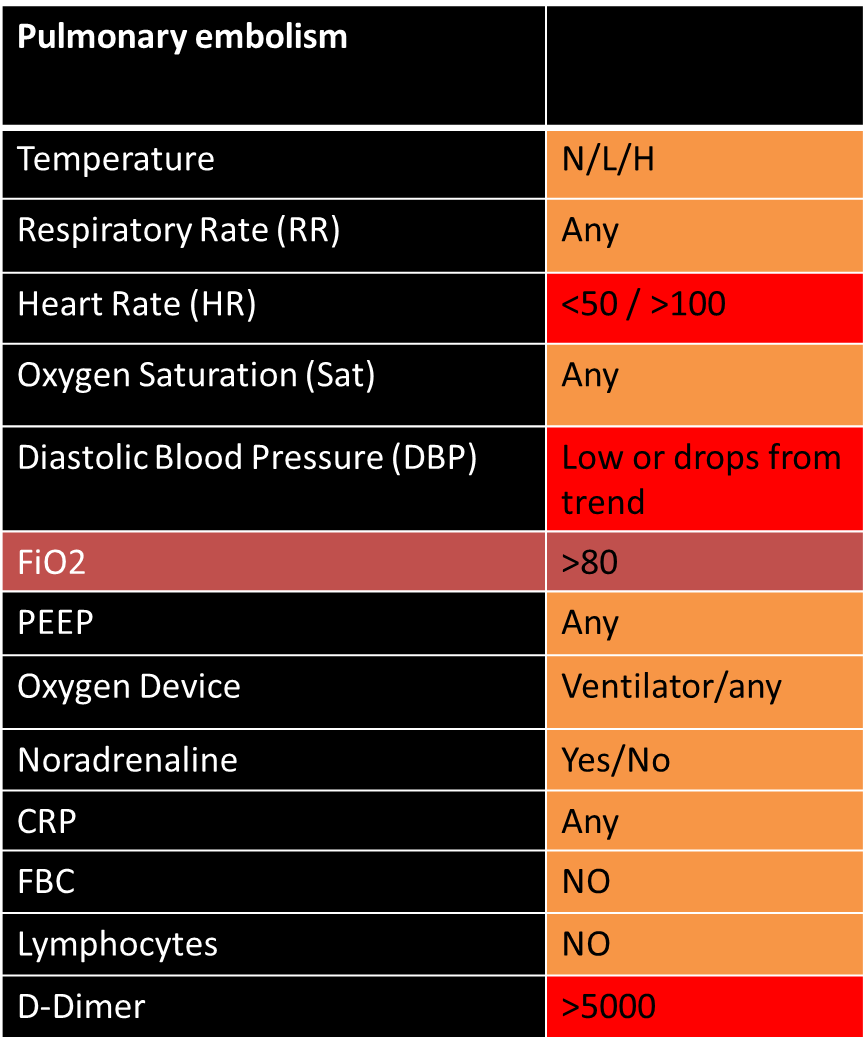
**

***Figure 4:

COVID-19 -Pulmonary Embolism***

Clinical indicators of concern

**deleted, identifying***, created March 2020*

**
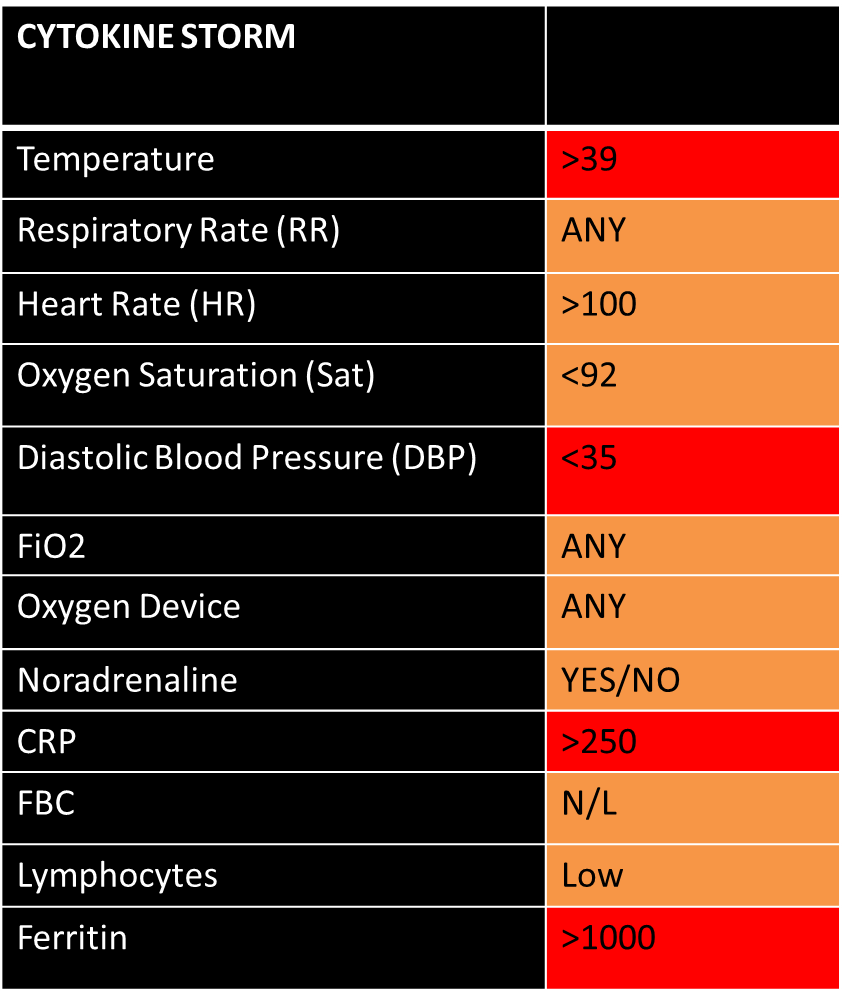
**

***Figure 5:

COVID-19 –Cytokine Storm***

Clinical indicators of concern

**deleted, identifying***, created March 2020*

**
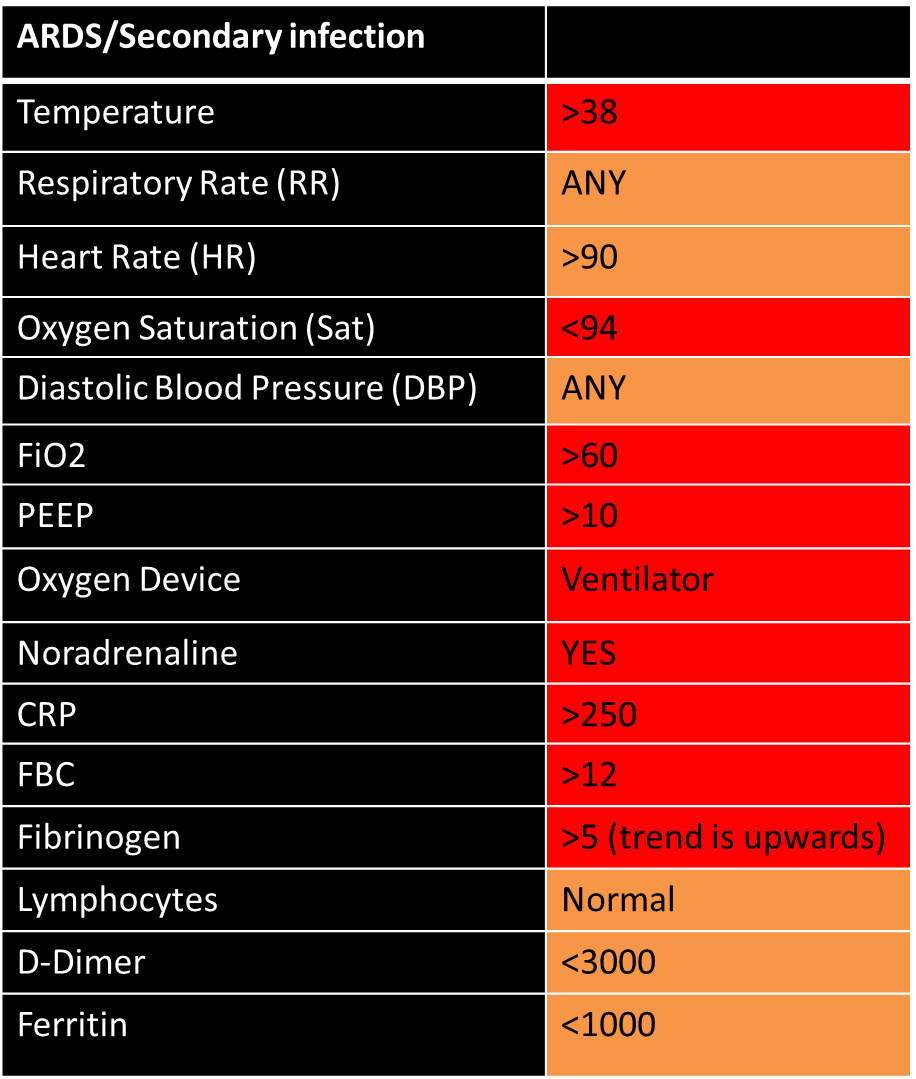
**

***Figure 6:***

***COVID-19 –ARDS***

Clinical indicators of concern

**deleted, identifying***, created March 2020*
