# Supplementary material
Source: Elsevier journal article supplement (https://www.sciencedirect.com/science/article/pii/S1413867020301094)
Supplement: mmc2 [file S1413867020301094:mmc2.doc]

**Increase in COVID-19 inpatient survival following detection of Thromboembolic and Cytokine storm risk from the point of admission to hospital by a near real time Traffic-light System (TraCe-Tic)**

**APPENDIX**

[Table A.1: Breakdown of cohort by admission and discharge times 2](#_Toc41414950)

[Table A.2: Comparison of cohort admission demographics 3](#_Toc41414951)

# Table A.1: Breakdown of cohort by admission and discharge times

|  | **Discharged or died1** | | |  |  |
| --- | --- | --- | --- | --- | --- |
|  | On or before 20th Mar | After 20th Mar2 up to 12th Apr | After 12th Apr up to 21st Apr | Still in hospital  on 21st Apr | Total |
| **Admitted** |  |  |  |  |  |
| Before 20th March 2020 | 37 | 116 | 17 | 10 | 180 |
| On/after 20th Mar, before 12th Apr | 0 | 381 | 187 | 54 | 622 |
| On/ after 12th Apr 2020 | 0 | 1 | 200 | 363 | 237 |
| Total | 37 | 498 | 404 | 100 | 1,039 |

Grey boxes indicate the “Pre” cohort (n=535) of patients admitted and who were either discharged, or died, on or before 12th April 2020. The two columns separate those who did and did not have the benefit of Traffic Lights feedback by MPV between 20th March 2020 and 12th April 2020.

Yellow boxes indicate the “Bridge” cohort (n=204) comprising those who were admitted before 12th April 2020 but were discharged (or died) after 12th April 2020.

The green box indicates the “Post” cohort (n=200) whowere admitted on or after 12th April 2020 and discharged after 12th April2020.

Notes:

1The median length of stay before death was 6 days (IQR 4, 11).

2 Lockdown in the United Kingdom was on 23rd March 2020 (main text reference 24).

3The current median length of stay is 26.5 days (IQR 13 to 33) for patients admitted after 12th April 2020 who remain in hospital.

The representations of the final categories are indicated below.


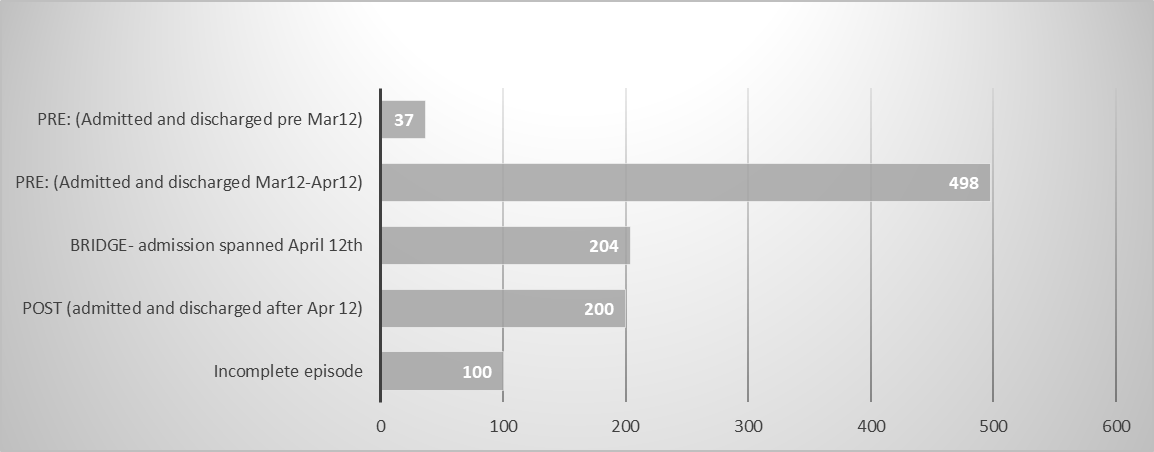


# Table A.2: Comparison of cohort admission demographics

| *Continuous variables* | **‘Pre’** | | | | **‘Bridge’** | | | | **‘Post’** | | | |  |
| --- | --- | --- | --- | --- | --- | --- | --- | --- | --- | --- | --- | --- | --- |
| *n* | *Median* | | *IQR* | *n* | *Median* | | *IQR* | *n* | *Median* | | *IQR* | *Kruskal Wallis p-value* |
| Age (years) | 535 | 67 | | 52, 80 | 204 | 70.5 | | 57, 82 | 200 | **71.5** | | 56, 82.5 | **0.0156** |
| Respiratory rate (min-1) | 511 | 23 | | 19, 28 | 193 | 23 | | 20, 28 | 189 | **24** | | 19, 28 | 0.88 |
| Oxygen saturation (SpO2 ,%) | 511 | 96 | | 92, 98 | 193 | **95** | | 92, 97 | 189 | 96 | | 94, 98 | **0.0001** |
| Urea (mmol/L) | 477 | 5.5 | | 3.9, 9.1 | 189 | **6.7** | | 4.7, 11.9 | 182 | **6.15** | | 4.4, 9.6 | **0.0017** |
| Creatinine (μmol/L) | 471 | **84** | | 68, 110 | 187 | **86** | | 67, 126 | 184 | 81.5 | | 65, 112 | 0.34 |
| White blood cell count (x109/L) | 503 | 7.1 | | 5.4, 9.8 | 202 | 7.65 | | 5.9, 10.4 | 190 | **8.3** | | 6.1, 11.3 | **0.0005** |
| Lymphocyte count (x109/L) | 503 | 0.9 | | 0.6, 1.3 | 202 | 0.9 | | 0.6, 1.2 | 190 | **1.05** | | 0.7, 1.5 | **0.0005** |
| Fibrinogen (g/L) | 301 | 6.42 | | 5.3, 7.7 | 151 | **6.98** | | 5.39, 8.02 | 127 | 6.34 | | 5.01, 7.65 | 0.089 |
| C-reactive protein (mg/L) | 507 | **97** | | 44, 173 | 204 | **118.7** | | 50, 181 | 191 | 70.4 | | 19, 156 | **0.0007** |
| D-dimer (ng/mL) | 285 | 1370 | | 750, 2490 | 161 | **1647** | | 1010, 2710 | 119 | **1562** | | 840, 3230 | 0.047 |
| Ferritin (μg/L) | 319 | **590** | | 288, 1146 | 180 | 484.5 | | 243.5, 1110 | 142 | 406.5 | | 179, 889 | **0.0071** |
| *Binary variables* | n | | Mean | | n | | Mean | | n | | Mean | | *KW p- value* |
| Sex (male) | 336/535 | | 0.628 | | 118/204 | | 0.578 | | 109/200 | | 0.545 | | 0.19 |
| Hypertension | 283/535 | | 0.529 | | 115/204 | | 0.564 | | 102/200 | | 0.510 | | 0.63 |
| Diabetes | 289/535 | | 0.353 | | 91/204 | | 0.446 | | 74/200 | | 0.370 | | 0.15 |
| Asthma | 137/535 | | 0.256 | | 51/204 | | 0.250 | | 79/200 | | 0.393 | | 0.37 |
| COPD | 53/535 | | 0.099 | | 16/204 | | 0.078 | | 26/200 | | 0.130 | | 0.66 |
| Thromboemboli -moderate risk | 283/535 | | 0.529 | | 170/204 | | **0.833** | | 115/200 | | **0.575** | | **0.0001** |
| Thromboemboli - high risk | 155/535 | | 0.290 | | 107/204 | | **0.525** | | 67/200 | | **0.335** | | **0.0001** |
| Thromboemboli - suspected | 44/535 | | 0.082 | | 52/204 | | **0.255** | | 28/200 | | **0.140** | | **0.0013** |
| Cytokine storm-moderate risk | 110/535 | | **0.206** | | 65/204 | | **0.319** | | 37/200 | | 0.185 | | **0.031** |
| Cytokine storm- high risk | 31/535 | | 0.058 | | 26/204 | | 0.127 | | 12/200 | | 0.060 | | 0.32 |
| Cytokine storm- suspected | 18/535 | | 0.034 | | 12.204 | | 0.059 | | 5/200 | | 0.025 | | 0.82 |
| ARDS -suspected | . | | . | | 26/58 | | 0.448 | | 20/58 | | 0.345 | | / |

Admission demographics, and critical disease flags during admission for the 939 COVID-positive patients in one of the three patient cohorts outlined in Supplementary Table 1. N, number in cohort with variable available; IQR interquartile range; KW Kruskal Wallis; COPD, Chronic obstructive pulmonary disease; ARDS adult respiratory distress syndrome. *p-* values in bold indicate variables which differed significantly across the 3 groups, and for these, the variables highest in the row is indicated in bold and shaded cells, the value higher between the ‘Pre’ and ‘Post’ cohorts in bold type only. The p-values are for the three way comparison including the Bridge cohort who appeared to have the most severe disease, but were not included in the main analyses as they experienced varying proportions of management time under the traffic light system**.**
